# Supplementary material
Source: PubMed Central journal article supplement (PMC3365703)

**Table S1. Primers used for cloning of *PAA1* and *PAA2***

| <b>AGI</b>                                    | <b>Gene</b>                 | <b>Sequence (5' to 3')</b>                               | <b>Sense</b>       |
|-----------------------------------------------|-----------------------------|----------------------------------------------------------|--------------------|
| At4g33520                                     | <i>PAA1</i> <i>NcoI</i>     | catgccatgGAGAGTGGTGATTCCAAGTCAAAACTGGG                   | Forward            |
|                                               | <i>PAA1</i> <i>BamHI</i>    | cgcgatccCTCGCGCCACTCTCTTTAAGCG                           | Reverse            |
| At5g21930                                     | <i>PAA2</i> <i>NcoI</i>     | catgccatgGAATCTTCAATCGAATCTGTGAAATCCATT                  | Forward            |
|                                               | <i>PAA2</i> <i>BamHI</i>    | cgcgatccACGGTTCCTGCTCTTAACAAGCAA                         | Reverse            |
| <b>qRT-PCR primers</b>                        |                             |                                                          |                    |
| <b>AGI</b>                                    | <b>Gene</b>                 | <b>Sequence (5' to 3')</b>                               | <b>Sense</b>       |
| At5g08290                                     | Mitosis protein <i>YLS8</i> | T TACTGTTTCGGTTGTTCTCCATTT<br>C ACTGAATCATGTTCTGAAGCAAGT | Forward<br>Reverse |
| At2g28390                                     | <i>SAND</i> family          | A AACTCTATGCAGCATTGATCCACT<br>T GATTGCATATCTTTATCGCCATC  | Forward<br>Reverse |
| At5g21930                                     | <i>PAA2</i>                 | A AATCTAGCGTGGGCAATTGCG<br>C TCCAAAATAGATGTGGAGCCG       | Forward<br>Reverse |
| At4g33520                                     | <i>PAA1</i>                 | A ACGACAAAATGTCAAACCGG<br>C CCCTCTCAAGACCAAGAGC          | Forward<br>Reverse |
| At1g12520                                     | <i>CCS</i>                  | A AGATCAAACCTGGCACAGAGCC<br>G C TCTCCCGATAAGGTCTGC       | Forward<br>Reverse |
| <b>miRNA Stem-loop qRT-PCR primers</b>        |                             |                                                          |                    |
| <b>AGI</b>                                    | <b>Gene</b>                 | <b>Sequence (5' to 3')</b>                               | <b>Sense</b>       |
| At2g47015                                     | <i>miR408</i> RT            | GTCGTATCCAGTGCAGGGTCCGAGGTATTTCGACTGGATACGACGCCAGG       | Reverse            |
|                                               | <i>miR408</i> SL            | G TGTGATGCACTGCCTCTTC                                    | Reverse            |
| At3g63375                                     | <i>miR167</i> RT            | GTCGTATCCAGTGCAGGGTCCGAGGTATTTCGACTGGATACGACTAGATC       | Reverse            |
|                                               | <i>miR167</i> SL            | T C GCGTGAAGCTGCCAGCAT                                   | Reverse            |
| -                                             | miRUniversal                | C CAGTGCAGGGTCCGAGG                                      | Forward            |
| <b><i>miR408</i> mutant line verification</b> |                             |                                                          |                    |
| <b>AGI</b>                                    | <b>Gene</b>                 | <b>Sequence (5' to 3')</b>                               | <b>Sense</b>       |
| At2g47015                                     | <i>miR408F</i>              | A GAGGGTTAGGAATACAGTTGG                                  | Forward            |
|                                               | <i>miR408R</i>              | C ATTTGTTTCACCCACTACGC                                   | Reverse            |
| T-DNA                                         | LBb1.3                      | A TTTTGCCGATTCGGAAC                                      | Forward            |

**Table S2. Cellular Cu content**

Cu content was measured for protoplasts and chloroplasts of wild-type (Col-0), *paa1-3*, and *ccs* plants grown *in vitro* for 4 weeks in the presence of 0.05  $\mu$ M or 5  $\mu$ M CuSO<sub>4</sub>. Values for protoplasts (cells) and chloroplasts of each line and treatment are given in ng Cu/ mg chlorophyll and represent averages of three measurements  $\pm$  SD. The ratio represents the fraction of cellular Cu found in the chloroplasts.

| CuSO <sub>4</sub> | Col-0                          |                                 | <i>paa1-3</i>                  |                                 | <i>ccs</i>                     |                                 |
|-------------------|--------------------------------|---------------------------------|--------------------------------|---------------------------------|--------------------------------|---------------------------------|
|                   | 0.05 $\mu$ M                   | 5 $\mu$ M                       | 0.05 $\mu$ M                   | 5 $\mu$ M                       | 0.05 $\mu$ M                   | 5 $\mu$ M                       |
| Protoplast        | <b>333 <math>\pm</math> 70</b> | <b>500 <math>\pm</math> 98</b>  | <b>385 <math>\pm</math> 68</b> | <b>580 <math>\pm</math> 162</b> | <b>312 <math>\pm</math> 63</b> | <b>523 <math>\pm</math> 145</b> |
| Chloroplast       | <b>234 <math>\pm</math> 38</b> | <b>440 <math>\pm</math> 163</b> | <b>137 <math>\pm</math> 41</b> | <b>247 <math>\pm</math> 75</b>  | <b>265 <math>\pm</math> 8</b>  | <b>382 <math>\pm</math> 174</b> |
| Ratio             | <b>0.7</b>                     | <b>0.88</b>                     | <b>0.36</b>                    | <b>0.43</b>                     | <b>0.85</b>                    | <b>0.73</b>                     |

## SUPPLEMENTARY FIGURES

### FIGURE S1. PAA1 and PAA2 antibody specificity

(a,b) Immunoblot analysis of PAA2, PAA1 and cFBPase in rosette leaves of wild-type (Col-0), *paa2-1* and *paa1-1* seedlings grown *in vitro* for 18 days on agar solidified half-strength MS. *paa1-1* and *paa2-1* were used as negative controls for the respective antigens. \*indicates an unspecific band.

### FIGURE S2. Root-length of metal treated wild-type (Col-0) plants

Root length of 11 days old Col-0 seedlings grown vertically in the absence (Ø) or presence of different metals. Results represent the average  $\pm$  SD ( $n \geq 13$  seedlings per treatment).

### FIGURE S3. *miR408* knock-out line characterization

(a) Map of the putative *miR408* targeting site within the *PAA2* coding sequence. The schematic drawing furthermore indicates the location of the T-DNA insertion within the *miR408* coding sequence. The primer binding sites for verification of the T-DNA insert are indicated. Exons are represented by black boxes and introns by black lines. (b) The presence of the T-DNA insert was analyzed by PCR using the primers listed in Table S1. (c) Expression levels of mature *miR408* measured via stem-loop qRT-PCR in the wild-type (Col-0) and *miR408* knock out background. Plants were grown in the presence of 0.05  $\mu$ M CuSO<sub>4</sub> (left, black bars) or 5  $\mu$ M CuSO<sub>4</sub> (right, grey bars). Results represent the average ( $\pm$  SD) of three biological replicates including two technical replicates each. n.d. means not detectable.

### FIGURE S4. Intactness of isolated protoplasts and chloroplasts

Immunoblot analysis of isolated protoplasts (P) and chloroplasts (C) from Col-0, *paa1-3* and *ccs* plants, grown in the presence of the indicated CuSO<sub>4</sub> concentrations for 4 weeks. Protein extract, equivalent to 1.7  $\mu$ g chlorophyll was loaded into each lane. Blots were probed for PC and CCS using specific antibodies. cFBPase serves as a cytosolic marker and ferredoxin (FDX) as stromal marker.

Figure S1

**A**

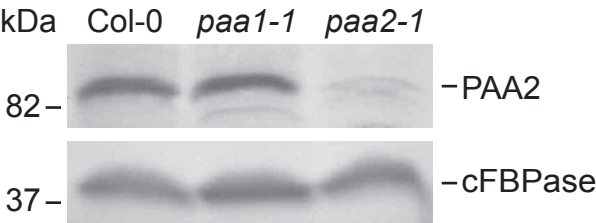

**B**

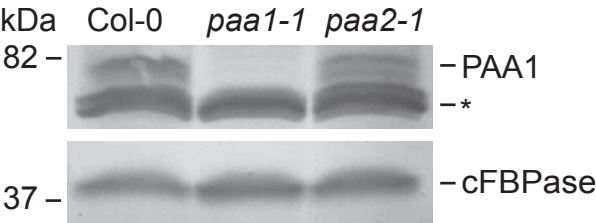

Figure S2

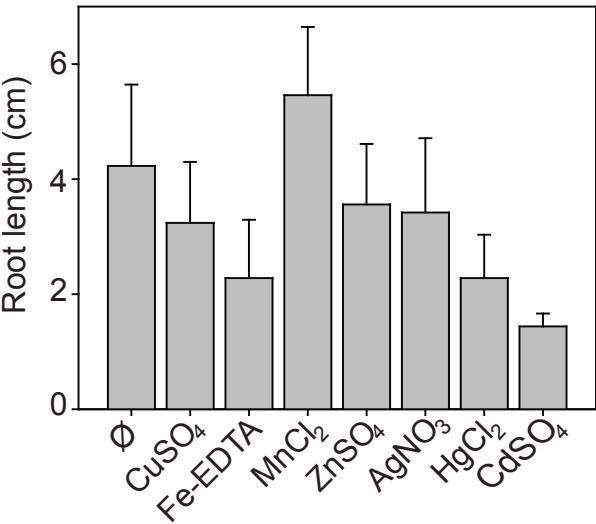

Figure S3

**A**

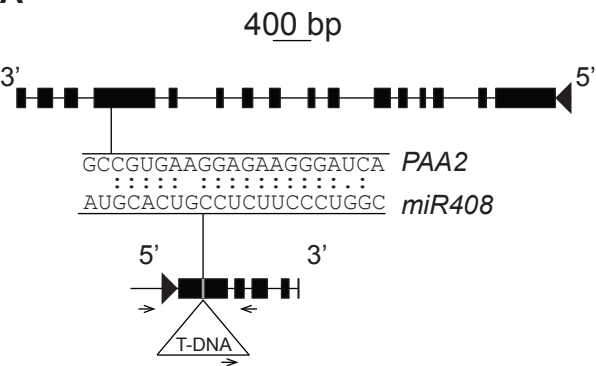

**B**

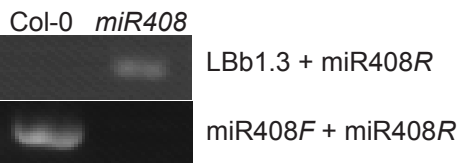

**C**

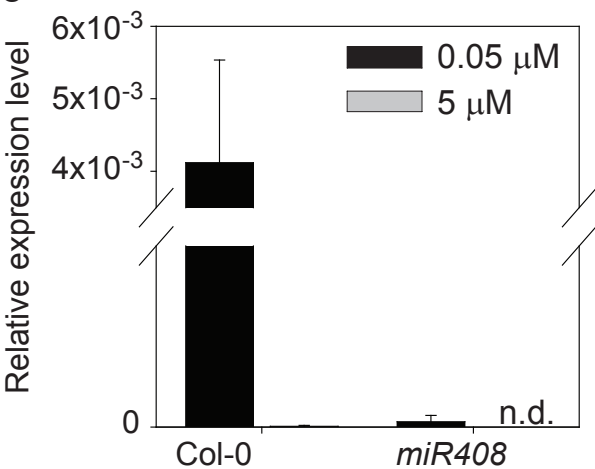

Figure S4

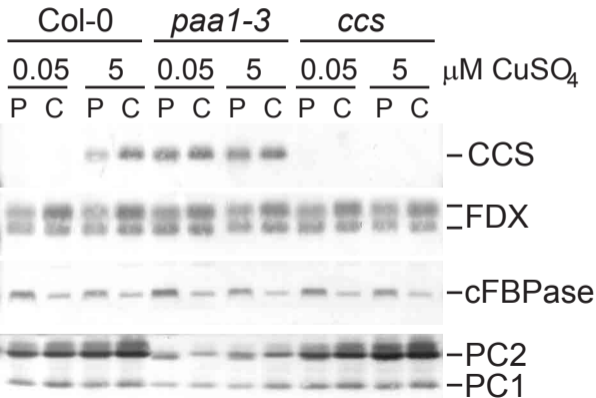

Supplement: supp_M111.318204_jbc.M111.318204-1.pdf [file supp_M111.318204_jbc.M111.318204-1.pdf]
